# Supplementary material for: Transcriptomic Analysis of Hormone Signal Transduction, Carbohydrate Metabolism, Heat Shock Proteins, and SCF Complexes before and after Fertilization of Korean Pine Ovules
Source: MDPI journal article supplement (doi:10.3390/ijms24076570), 2023-03-31
Supplement: s1 [file s1]

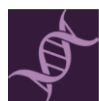

## Supplementary Material

**Supplementary Table S1.** Statistics of reads quality after filtering

| Sample | Total Raw Reads (M) | Total Clean Reads (M) | Total Clean Bases(Gb) | Clean Reads Q20(%) | Clean Reads Q30(%) | N(%) |
|--------|---------------------|-----------------------|-----------------------|--------------------|--------------------|------|
| ZA1    | 43.82               | 43.11                 | 6.47                  | 97.82              | 93.78              | 0.46 |
| ZA2    | 43.82               | 42.95                 | 6.44                  | 97.88              | 93.97              | 0.49 |
| ZA3    | 43.82               | 43.03                 | 6.45                  | 97.91              | 94.07              | 0.47 |
| ZB1    | 43.82               | 42.79                 | 6.42                  | 97.95              | 94.16              | 0.92 |
| ZB2    | 43.82               | 42.83                 | 6.42                  | 97.95              | 94.17              | 0.95 |
| ZB3    | 43.82               | 42.72                 | 6.41                  | 97.9               | 94                 | 0.94 |
| ZC1    | 43.82               | 42.99                 | 6.45                  | 97.84              | 93.84              | 0.91 |
| ZC2    | 43.82               | 42.92                 | 6.44                  | 97.85              | 93.9               | 0.93 |
| ZC3    | 45.57               | 43.47                 | 6.52                  | 98.03              | 94.41              | 0.92 |
| ZD1    | 43.82               | 42.77                 | 6.42                  | 97.82              | 93.83              | 0.93 |
| ZD2    | 43.82               | 42.93                 | 6.44                  | 97.81              | 93.75              | 0.98 |
| ZD3    | 43.82               | 42.91                 | 6.44                  | 97.9               | 94                 | 0.96 |

**Supplementary Table S2.** Comparison results with Korean pine reference genome

| Sample | Total Clean Reads (M) | Total Mapping(%) | Uniquely Mapping(%) |
|--------|-----------------------|------------------|---------------------|
| ZA1    | 43.11                 | 92.77            | 62.86               |
| ZA2    | 42.95                 | 92.67            | 63.96               |
| ZA3    | 43.03                 | 92.33            | 62.35               |
| ZB1    | 42.79                 | 92.08            | 65.81               |
| ZB2    | 42.83                 | 92.16            | 65.72               |
| ZB3    | 42.72                 | 92.29            | 65.48               |
| ZC1    | 42.99                 | 92.06            | 65.14               |
| ZC2    | 42.92                 | 92.99            | 65.88               |
| ZC3    | 43.47                 | 91.69            | 65.66               |
| ZD1    | 42.77                 | 92.76            | 65.97               |
| ZD2    | 42.93                 | 92.19            | 65.09               |
| ZD3    | 42.91                 | 92.72            | 65.95               |

**Supplementary Table S3.** qRT-PCR primer sequences in Korean pine

| Unigenes                                 | Forward primer           | Reverse primer           |
|------------------------------------------|--------------------------|--------------------------|
| 18s (Internal reference)                 | GCGGTGGTTTATGTGTTTG      | GAAAGGGTTGAGGTAGGAAG     |
| c154707.graph_c1<br>(Internal reference) | CAGCTCAGCTTGAAATGA       | ACGAGTACTGTGAGGAAA       |
| Pkor06G00725                             | CTCGTTGTCAAAGTGATCCT     | AAATCCTTCCAAACCAACCT     |
| Pkor09G02425                             | AAGAGGTTATGTGAGCTGACT    | CCTTCAATCATCCTAGCAAGAG   |
| Pkor05G01532                             | CGTCCTTAGCTGTGATGTT      | CCATTGGAGGAGGTTGATT      |
| Pkor10G02308                             | GCCAGATGAGGACATTACA      | CCATTCTAGCAGTGTTCATTG    |
| Pkor01G00962                             | TCAAGAACTTGCTCGTATGT     | GGATCATCTCCAACAAGAAGA    |
| Pkor03G02356                             | CTCGGTTTGTGATAAAGACGGAAT | CATACTCCTTCTCTGCATCCTCTA |
| Pkor12G00743                             | CATCAGCAGCATCAGCAA       | TTGTGGCATAAGCAGCAG       |
| Pkor04G01664                             | GGAAATCACGAGGATACT       | CTCTGCATCTCCATACAT       |
| Pkor04G00304                             | AGGAACAGTTAGCAGACT       | CCTCAAATTGAAGACCACT      |
| Pkor01G02970                             | CTTAGAGGCAACACGAGAG      | CTACACCAGCAGCAAGAA       |
